# Supplementary material for: Cytotoxicity, Mitochondrial Functionality, and Redox Status of Human Conjunctival Cells after Short and Chronic Exposure to Preservative-Free Bimatoprost 0.03% and 0.01%: An In Vitro Comparative Study
Source: MDPI journal article supplement (doi:10.3390/ijms232214113), 2022-11-15
Supplement: s1 [file s1]

## Supplementary materials

**Cytotoxicity, mitochondrial functionality, and redox status of human conjunctival cells after short and chronic exposure to preservative-free bimatoprost 0.03% and 0.01%: an *in vitro* comparative study.**

**Sabrina Petricca<sup>1</sup>, Giuseppe Celenza<sup>1,\*</sup>, Ciro Costagliola<sup>2</sup>, Fausto Tranfa<sup>2</sup>, and Roberto Iorio<sup>1</sup>**

1 Department of Biotechnological and Applied Clinical Sciences, University of L'Aquila, L'Aquila, Italy

2 Department of Neurosciences, Reproductive and Dentistry Sciences, University of Federico II, Naples, Italy

**Correspondence\*** to Giuseppe Celenza, Department of Biotechnological and Applied Clinical Sciences, University of L'Aquila, Via Vetoio, 1, L'Aquila, 67100, Italy.

e-mail: [giuseppe.celenza@univaq.it](mailto:giuseppe.celenza@univaq.it)

**Keywords:** Bimatoprost; preservative-free; glaucoma; human conjunctival epithelial cells; cell cycle; mitochondrial activity; ROS; apoptosis

**Table S1.** List of the input molecules used for drug network prediction using the STITCH database. <sup>a</sup>PubChem CID for chemicals, UniProt code for proteins.

| Molecule    | Code <sup>a</sup> | Description                                                                       |
|-------------|-------------------|-----------------------------------------------------------------------------------|
| bimatoprost | 127909            | bimatoprost                                                                       |
| PGE2        | 158               | prostaglandin E2 (PGE2)                                                           |
| GOT2        | P00505            | glutamic-oxaloacetic transaminase 2, (mitochondrial aspartate aminotransferase 2) |
| MDH2        | P40926            | malate dehydrogenase 2, NAD (mitochondrial)                                       |
| SLC1A3      | P43003            | solute carrier family 1 (glial high-affinity glutamate transporter), member 3     |
| SLC25A11    | Q02978            | solute carrier family 25 (mitochondrial carrier; oxoglutarate carrier), member 11 |
| UCP1        | P25874            | uncoupling protein 1 (mitochondrial, proton carrier)                              |
| UCP2        | P55851            | uncoupling protein 2 (mitochondrial, proton carrier)                              |
| UCP3        | P55916            | uncoupling protein 3 (mitochondrial, proton carrier)                              |

**Table S2.** Predicted drug network functional partners from STITCH database (<http://stitch.embl.de/>) ranked by combined score, using the input molecules reported in Table S1. <sup>a</sup>PubChem CID for chemicals, UniProt code for proteins.

| Node            | Code <sup>a</sup> | Description                                                                                  | Neighbourhood | Gene Fusion | Co-occurrence | Co-expression | Experiments | Databases | Text-mining | Prediction | Homology | Combined score |
|-----------------|-------------------|----------------------------------------------------------------------------------------------|---------------|-------------|---------------|---------------|-------------|-----------|-------------|------------|----------|----------------|
| PTGER4          | P35408            | <i>prostaglandin E receptor 4 (subtype EP4)</i>                                              |               |             |               |               | •           | •         | •           |            |          | 0.999          |
| PTGER3          | P43115            | <i>prostaglandin E receptor 3 (subtype EP3)</i>                                              |               |             |               |               | •           | •         | •           |            |          | 0.999          |
| PTGER1          | P34995            | <i>prostaglandin E receptor 1 (subtype EP1)</i>                                              |               |             |               |               | •           | •         | •           |            |          | 0.998          |
| PTGER2          | P43116            | <i>prostaglandin E receptor 2 (subtype EP2)</i>                                              |               |             |               |               | •           | •         | •           |            |          | 0.998          |
| CS              | O75390            | <i>citrate synthase</i>                                                                      | •             |             |               | •             | •           | •         | •           |            |          | 0.996          |
| PTGS2           | P35354            | <i>prostaglandin-endoperoxide synthase 2 (prostaglandin G/H synthase and cyclooxygenase)</i> |               |             |               |               |             | •         | •           |            |          | 0.995          |
| FH              | P07954            | <i>fumarate hydratase</i>                                                                    | •             |             |               | •             | •           | •         | •           |            |          | 0.994          |
| oxaloacetate    | 970               | <i>oxaloacetic acid</i>                                                                      |               |             |               |               | •           | •         | •           |            |          | 0.993          |
| glutamic acid   | 611               | <i>monopotassium glutamate (MPG)</i>                                                         |               |             |               |               | •           | •         | •           |            |          | 0.992          |
| pyridoxal phos. | 1051              | <i>pyridoxal phosphate</i>                                                                   |               |             |               |               | •           | •         | •           |            |          | 0.990          |
| malate          | 525               | <i>magnesium malate</i>                                                                      |               |             |               |               | •           | •         | •           |            |          | 0.990          |
| carboxy         | 283               | <i>formate, (alias fatty acids)</i>                                                          |               |             |               |               | •           | •         | •           |            |          | 0.989          |
| phosphate       | 1003              | <i>Phosphoric acid</i>                                                                       |               |             |               |               | •           | •         | •           |            |          | 0.989          |
| IL8             | P10145            | <i>interleukin 8</i>                                                                         |               |             |               |               |             | •         | •           |            |          | 0.988          |
| MDH1            | P40925            | <i>malate dehydrogenase 1</i>                                                                |               |             |               | •             |             | •         | •           |            |          | 0.987          |
| rosiglitazone   | 77998             | <i>rosiglitazone is an antidiabetic drug in the thiazolidinedione class of drugs</i>         |               |             |               |               |             | •         | •           |            |          | 0.987          |
| CXCR6           | O00574            | <i>chemokine (C-X-C motif) receptor 6</i>                                                    |               |             |               |               | •           | •         | •           |            |          | 0.986          |
| LDHC            | P07864            | <i>lactate dehydrogenase C</i>                                                               |               |             |               | •             |             | •         | •           |            |          | 0.984          |

|       |        |                                |   |   |   |       |
|-------|--------|--------------------------------|---|---|---|-------|
| LDHB  | P07195 | <i>lactate dehydrogenase B</i> | • | • | • | 0.984 |
| ADCY2 | Q08462 | <i>adenylate cyclase 2</i>     |   | • | • | 0.983 |

**Table S3.** Predicted drug network functional partners from STITCH database (<http://stitch.embl.de/>) ranked by combined score, including rosiglitazone as input molecule. <sup>a</sup>PubChem CID for chemicals, UniProt code for proteins.

| Node            | Code <sup>a</sup> | Description                                                                                  | Neighbourhood | Gene Fusion | Co-occurrence | Co-expression | Experiments | Databases | Text-mining | Prediction | Homology | Combined score |
|-----------------|-------------------|----------------------------------------------------------------------------------------------|---------------|-------------|---------------|---------------|-------------|-----------|-------------|------------|----------|----------------|
| PTGER4          | P35408            | <i>prostaglandin E receptor 4 (subtype EP4)</i>                                              |               |             |               |               | •           | •         | •           |            |          | 0.999          |
| PPARG           | P37231            | <i>peroxisome proliferator-activated receptor gamma</i>                                      |               |             |               |               | •           | •         | •           |            |          | 0.999          |
| PTGER3          | P43115            | <i>prostaglandin E receptor 3 (subtype EP3)</i>                                              |               |             |               |               | •           | •         | •           |            |          | 0.999          |
| PPARA           | Q07869            | <i>peroxisome proliferator-activated receptor alpha</i>                                      |               |             |               |               | •           | •         | •           |            |          | 0.999          |
| PTGER1          | P34995            | <i>prostaglandin E receptor 1 (subtype EP1)</i>                                              |               |             |               |               | •           | •         | •           |            |          | 0.998          |
| PTGER2          | P43116            | <i>prostaglandin E receptor 2 (subtype EP2)</i>                                              |               |             |               |               | •           | •         | •           |            |          | 0.998          |
| CS              | O75390            | <i>citrate synthase</i>                                                                      | •             |             | •             | •             | •           | •         | •           |            |          | 0.996          |
| RETN            | Q9HD89            | <i>resistin</i>                                                                              |               |             |               |               |             | •         | •           |            |          | 0.996          |
| PTGS2           | P35354            | <i>prostaglandin-endoperoxide synthase 2 (prostaglandin G/H synthase and cyclooxygenase)</i> |               |             |               |               |             | •         | •           |            |          | 0.995          |
| FH              | P07954            | <i>fumarate hydratase</i>                                                                    | •             |             | •             | •             | •           | •         | •           |            |          | 0.994          |
| oxaloacetate    | 970               | <i>oxaloacetic acid</i>                                                                      |               |             |               |               | •           | •         | •           |            |          | 0.993          |
| glutamic acid   | 611               | <i>monopotassium glutamate (MPG)</i>                                                         |               |             |               |               | •           | •         | •           |            |          | 0.992          |
| ADIPOQ          | Q15848            | <i>adiponectin</i>                                                                           |               |             |               |               |             | •         | •           |            |          | 0.991          |
| malate          | 525               | <i>magnesium malate</i>                                                                      |               |             |               |               | •           | •         | •           |            |          | 0.990          |
| pyridoxal phos. | 1051              | <i>pyridoxal phosphate</i>                                                                   |               |             |               |               | •           | •         | •           |            |          | 0.990          |
| carboxy         | 283               | <i>formate, (alias fatty acids)</i>                                                          |               |             |               |               | •           | •         | •           |            |          | 0.989          |
| phosphate       | 1003              | <i>phosphoric acid</i>                                                                       |               |             |               |               | •           | •         | •           |            |          | 0.989          |
| LEP             | P41159            | <i>leptin</i>                                                                                |               |             |               |               |             | •         | •           |            |          | 0.989          |
| CD36            | P16671            | <i>platelet glycoprotein 4</i>                                                               |               |             |               |               |             | •         | •           |            |          | 0.988          |
| IL8             | P10145            | <i>interleukin 8</i>                                                                         |               |             |               |               |             | •         | •           |            |          | 0.988          |
